# Supplementary material for: CoCO2-MOSAIC 1.0: a global mosaic of regional, gridded, fossil and biofuel CO 2 emission inventories
Source: Copernicus journal article supplement (doi:10.5194/essd-2023-210), 2023-06-27
Supplement: Supplementary file 1 [file essd-2023-210-supplement.pdf]

## SUPPLEMENTARY MATERIAL

### **CoCO<sub>2</sub>-MOSAIC 1.0: a global mosaic of regional, gridded, fossil and biofuel CO<sub>2</sub> emission inventories**

5 Ruben Urraca<sup>1</sup>, Greet Janssens-Maenhout<sup>1</sup>, Nicolás Álamos<sup>2</sup>, Lucas Berna-Peña<sup>3</sup>, Monica Crippa<sup>1,4</sup>, Sabine Darras<sup>5</sup>, Stijn Dellaert<sup>6</sup>, Hugo Denier van der Gon<sup>6</sup>, Mark Dowell<sup>1</sup>, Nadine Gobron<sup>1</sup>, Claire Granier<sup>7,8</sup>, Giacomo Grassi<sup>1</sup>, Marc Guevara<sup>9</sup>, Diego Guizzardi<sup>1</sup>, Kevin Gurney<sup>10</sup>, Nicolás Huneeus<sup>2</sup>, Sekou Keita<sup>7</sup>, Jeroen Kuenen<sup>6</sup>, Ana Lopez-Noreña<sup>3</sup>, Enrique Puliafito<sup>3</sup>, Geoffrey Roest<sup>10</sup>, Simone Rossi<sup>1,11</sup>, Antonin Soulie<sup>7</sup>, Antoon Visschedijk<sup>6</sup>

- 10 <sup>1</sup>European Commission, Joint Research Centre, Via Enrico Fermi 2749, I-21027 Ispra, Italy  
<sup>2</sup>Center for Climate and Resilience Research, Universidad de Chile, Santiago, Chile  
<sup>3</sup>Research Group for Atmospheric and Environmental Studies (GEAA), Mendoza Regional Faculty  
<sup>4</sup>Uni Systems Italy, Via Michelangelo Buonarroti 39, 20145 Milano, Italy  
<sup>5</sup>Observatoire Midi-Pyrénées, Toulouse, France  
15 <sup>6</sup>TNO, Department of Climate, Air and Sustainability, Princetonlaan 6, 3584 CB Utrecht, the Netherlands  
<sup>7</sup>Laboratoire d'Aérodologie, CNRS-Université de Toulouse, Toulouse, France  
<sup>8</sup>NOAA Chemical Sciences Laboratory, CIRES, University of Colorado Boulder, Boulder, CO, USA  
<sup>9</sup>Barcelona Supercomputing Center, Barcelona, Spain  
<sup>10</sup>School of Informatics, Computing, and Cyber Systems, Northern Arizona University, Flagstaff, AZ, USA  
20 <sup>11</sup>Arcadia SIT, Via Pessano, 20151 Milano, Italy

*Correspondence to:* Ruben Urraca (ruben.urraca-valle@ec.europa.eu)

## Table of contents

|    |       |                                                                   |    |
|----|-------|-------------------------------------------------------------------|----|
| 25 | 1     | Description of input emission inventories .....                   | 3  |
|    | 1.1   | Regional emission inventories integrated in CoCO2-MOSAIC 1.0..... | 3  |
|    | 1.1.1 | CAMS-REG-GHG 5.1.....                                             | 3  |
|    | 1.1.2 | DACCIWA 2.0.....                                                  | 4  |
|    | 1.1.3 | GEAA-AEI 3.0.....                                                 | 4  |
| 30 | 1.1.4 | INEMA 1.0.....                                                    | 5  |
|    | 1.1.5 | REAS 3.2.1.....                                                   | 5  |
|    | 1.1.6 | VULCAN 3.0.....                                                   | 6  |
|    | 1.2   | Global emission inventories used for gap-filling .....            | 7  |
|    | 1.2.1 | EDGAR 6.0.....                                                    | 7  |
| 35 | 1.2.2 | CAMS-GLOB-SHIP 3.1.....                                           | 7  |
|    | 1.2.3 | CAMS-GLOB-TEMPO 3.1.....                                          | 7  |
|    | 1.3   | Global emission inventories for the inter-comparison.....         | 9  |
|    | 1.3.1 | CAMS-GLOB-ANT 5.3.....                                            | 9  |
|    | 1.3.2 | CEDS v2021_04_21.....                                             | 10 |
| 40 | 1.3.3 | ODIAC v2020b.....                                                 | 11 |
|    | 1.3.4 | CAMS-GLOB-AIR 1.1.....                                            | 11 |
|    | 2     | IEA definition of biofuel .....                                   | 12 |
|    | 3     | CoCO2-MOSAIC 1.0 description.....                                 | 13 |
|    | 3.1   | File structure and format description.....                        | 13 |
| 45 | 3.2   | Country mask .....                                                | 15 |
|    | 4     | Additional figures and tables for the inter-comparison .....      | 21 |
|    | 5     | References .....                                                  | 27 |

## 1 Description of input emission inventories

### 50 1.1 Regional emission inventories integrated in CoCO2-MOSAIC 1.0

#### 1.1.1 CAMS-REG-GHG 5.1

The Copernicus Atmosphere Monitoring Service (CAMS) has been providing consistent estimations of anthropogenic emissions over Europe since 2009, from the former TNO-MAC series to the current CAMS-GLOB-ANT and CAMS-REG inventories. CAMS datasets cover both air pollutants and greenhouse gases. The global mosaic uses CAMS-REG-GHG 5.1, which provides CH<sub>4</sub>, CO<sub>2</sub>ff, CO<sub>2</sub>bf gridded emissions over Europe [30° to 72°N, -30° to 60°E] during 2000-2018 (version 5.1) (Kuenen et al., 2022). Annual CO<sub>2</sub> emissions are calculated at country level for each of the 209 source categories. These values are based on the emissions officially reported by European countries in their national inventories. The IIASA GAINS model is used to fill gaps or replace low quality data. EDGAR 4.3.2 emission gridmaps of (Janssens-Maenhout et al., 2019) are used in countries outside UNECE-Europe but still within the bounding box of CAMS-REG (e.g., North African countries). Emissions are spatially allocated using proxy datasets such as traffic intensity, road network, CORINE land cover, population density, or power plant list, among others, as specified in (Kuenen et al., 2022). The 209 emission categories are aggregated into the Gridded Nomenclature For Reporting (GNFR) sectors. More details on the sector classification can be found at <https://www.ceip.at/reporting-instructions>. CAMS-REG-GHG 5.1 is freely available at ECCAD (<https://eccad3.sedoo.fr/>) For CoCO2-MOSAIC 1.0, we used a specific version prepared by the CAMS team re-arranging some GNFR sectors to match better the CoCO2-MOSAIC sectors (Table S1).

**Table S1: Description of CAMS-REG-GHG 5.1 sectors**

| Sector                            | Comments                                                                        |
|-----------------------------------|---------------------------------------------------------------------------------|
| A_PublicPower                     |                                                                                 |
| B_Industry                        | For this version, 1A1b and 1A1c were moved to D_Fugitives                       |
| C_OhterStationaryComb             | -                                                                               |
| D_Fugitives                       | -                                                                               |
| E_Solvents                        | -                                                                               |
| F1_RoadTransport_Exhaust_Gasoline | -                                                                               |
| F2_RoadTransport_Exhaust_Diesel   | -                                                                               |
| F3_RoadTransport_Exhaust_LPG_gas  | -                                                                               |
| F4_RoadTransport_NonExhaust       | -                                                                               |
| G_Shipping                        | Only inland shipping                                                            |
| H_Aviation                        | Only Landing and Take-off cycles (LTO) in airports                              |
| I_OffRoad                         | -                                                                               |
| J_Waste                           | Waste incineration with energy recovery has been already moved to A_PublicPower |
| K_AgriLivestock                   | Sector discarded, as it does not produce CO <sub>2</sub> emissions.             |
| L_AgriOther                       | -                                                                               |

### 1.1.2 DACCIWA 2.0

70 The DACCIWA project develops an inventory of gridded anthropogenic emissions for Africa. The first version, DACCIWA 1.0 (Keita et al., 2021), provided emissions from atmospheric pollutants (BC, OC, CO, NO<sub>x</sub>, SO<sub>2</sub> and NMVOCs) considering only combustion sources. Within the framework of CoCO2 Task 2.1, a new DACCIWA 2.0 inventory has been developed covering CO<sub>2</sub>ff, CO<sub>2</sub>bf and CH<sub>4</sub>, and considering other anthropogenic sources (e.g., fugitive emissions) in addition to fossil fuel combustion. The inventory provides annual emissions from 2015 to 2018 at 0.1°×0.1°. Activity data 75 come primarily from the United Nations Statistics Division (UNSTAT) database (<http://data.un.org/Explorer.aspx>). CO<sub>2</sub> emission factors derived from field measurements (Keita et al., 2018) were used for residential, commercial, road transport and open waste burning. The CH<sub>4</sub> emission factors from (Akagi et al., 2011), for charcoal making and solid waste burning, and from (Dolumbia et al., 2019), for gas flaring, are used. The default emission factors from IPCC (2006) were used for other sources. Emissions were spatially allocated using population density, road network and African power plant network 80 given by the Africa infrastructure (<https://powerafrica.opendataforafrica.org>). DACCIWA 2.0 aggregates the emissions in the same seven group of sectors that those defined for CoCO2-MOSAIC 1.0. DACCIWA 2.0 is freely available at ECCAD: <https://eccad3.sedoo.fr/>.

### 1.1.3 GEAA-AEI 3.0

The Research Group for Atmospheric and Environmental Studies (GEAA) produces the Argentine Emission Inventory 85 (GEAA-AEI), which provides monthly gridded emissions of 12 air pollutants and GHGs (CO<sub>2</sub>, CH<sub>4</sub>, N<sub>2</sub>O) from 1955 to 2020 (version 3.0) (Puliafito et al., 2021). The inventory is calculated following a bottom-up approach as follows: (i) geolocation of emission sources, (ii) identification of the activity data for each source and sector, (iii) development of a consistent monthly evolution, (iv) application of emission factors, (v) production of the raster files. GEAA-AEI 3.0 is freely available at <https://doi.org/10.17632/d6xrhpmzdp.2>. For this mosaic, the GEAA team prepared a specific version splitting 90 CO<sub>2</sub> emissions in CO<sub>2</sub>ff and CO<sub>2</sub>bf, and rearranging some sectors to match better the description of the mosaic sectors (Table S2).

**Table S2: Description of GEAA-AEI 3.0 sectors**

| Sector  | Description                          | IPCC code | Point source |
|---------|--------------------------------------|-----------|--------------|
| CEN     | Thermal power plants                 | 1A1a      | yes          |
| WAS     | Open urban waste burning             | 4C        | yes          |
| IND_FUE | Industrial own fuel consumption      | 1A2       | no           |
| IND_PRO | Industrial production                | 2B, 2C    | yes          |
| COM     | Commercial                           | 1A4a      | no           |
| GOV     | Governmental                         | 1A4a      | no           |
| RES     | Residential                          | 1A4b      | no           |
| FAG     | Fuel use in agriculture              | 1A4c      | no           |
| AVI     | National aviation, only LTO (< 390m) | 1A3a      | no           |
| VEH     | Vehicular road transport             | 1A3b      | no           |
| TRE     | Railroad                             | 1A3c      | no           |

|     |                                                   |      |    |
|-----|---------------------------------------------------|------|----|
| BAR | Coastal-fluvial navigation (only national bunker) | 1A3d | no |
|-----|---------------------------------------------------|------|----|

### 1.1.4 INEMA 1.0

95 The Inventario Nacional de Emisiones Antropogénicas (INEMA v1.0) (Álamos et al., 2022) is the first Chilean gridded emission inventory of anthropogenic emissions of air pollutants (NO<sub>x</sub>, SO<sub>2</sub>, CO, VOCs, NH<sub>3</sub>, PM<sub>10</sub>, PM<sub>2.5</sub>, and BC) and GHGs (CO<sub>2</sub>, CH<sub>4</sub>). INEMA provides annual gridded (0.01°×0.01°) emissions for the inventory years 2015 to 2017 disaggregated into five different sectors. In the energy, industry, and mining sectors, point emissions self-reported by Chilean industrial facilities to the Registro de Emisiones y Transporte de Contaminantes (RETC, <https://retc.mma.gob.cl>) are used. In residential and transport sectors, emissions are calculated as non-point sources based on firewood consumption and number of vehicles. Possibly some gas or oil use emissions are missing which especially for air pollutants are assumed to be of minor importance. The spatial allocation of residential and transport emissions is made based on population density and the road network, respectively, as described by Alamos et al. (2022). The current version of the inventory does not split CO<sub>2</sub>ff and CO<sub>2</sub>bf. Energy, mining and industry sectors report the sum of CO<sub>2</sub>ff and CO<sub>2</sub>bf, the residential sector only includes CO<sub>2</sub>bf from firewood consumption, and the transport sector only reports CO<sub>2</sub>ff emissions (Table S3). INEMA 1.0 is freely available at <https://doi.org/10.5281/zenodo.4784286>.

**Table S3: Description of INEMA 1.0 sectors**

| Sector      | CO <sub>2</sub>                         | Description                                                                                                                                                                   | IPCC code                 |
|-------------|-----------------------------------------|-------------------------------------------------------------------------------------------------------------------------------------------------------------------------------|---------------------------|
| Energy      | CO <sub>2</sub> ff + CO <sub>2</sub> bf | RTEC point sources: production and distribution of fuels and the generation of electric energy.                                                                               | 1A1                       |
| Mining      | CO <sub>2</sub> ff + CO <sub>2</sub> bf | RTEC point sources: Production and smelting of metals                                                                                                                         | 2C1-4                     |
| Industry    | CO <sub>2</sub> ff + CO <sub>2</sub> bf | RTEC point sources: remaining point sources outside the 'Energy' and 'Mining' sectors.                                                                                        | 1A2, 2*<br>(excluding 2C) |
| Residential | CO <sub>2</sub> bf                      | Combustion of biomass for heating, cooking, and heating water.                                                                                                                | 1A4b                      |
| Transport   | CO <sub>2</sub> ff                      | Exhaust emissions from vehicles traveling on public routes nationwide in urban and interurban area.<br>Rail, air, and sea modes are not included, nor are off-road machinery. | 1A3b                      |

### 1.1.5 REAS 3.2.1

110 The Regional Emission inventory in ASia (REAS) series provides long-term emissions from major anthropogenic air and climate pollutants over East, South and South-East Asia. The latest version available is REAS v3.2.1 (Kurokawa and Ohara, 2020), a long-term (1950-2015) gridded inventory that provides monthly emissions of SO<sub>2</sub>, NO<sub>x</sub>, CO, NMVOCs, NH<sub>3</sub>, PM<sub>10</sub>, PM<sub>2.5</sub>, BC, OC, CO<sub>2</sub>ff, CO<sub>2</sub>bf. REAS v3 is produced following a bottom-up approach. Annual activity data at country level are collected from different international and national statistics and national emission inventories. Emissions factors from research papers and from national inventories are used. Annual emissions per country are spatially allocated with proxy datasets such as HYDE 3.2.1 total population gridmaps (residential sector) or EDGAR 4.3.2 transport emission gridmaps (transport sector). The position of industry and power plant emissions was checked manually and with global

120 databases, and large power plants were made available as point sources. Monthly emissions were estimated also using proxy datasets such as monthly energy production statistics, monthly industrial production statistics, or monthly surface temperature. Table S4 shows the sectors available for CO<sub>2</sub>. The emissions are split in CO<sub>2</sub>ff and CO<sub>2</sub>bf, but some sectors only report CO<sub>2</sub>ff emissions.

**Table S4: Description of REAS 3.2.1 sectors**

| Sector                 | Description                                                                                             | CO <sub>2</sub>                        |
|------------------------|---------------------------------------------------------------------------------------------------------|----------------------------------------|
| POWER PLANTS POINT     | Power and heat plants as point sources.                                                                 | CO <sub>2</sub> ff                     |
| POWER PLANTS NON-POINT | Power and heat plants as non-point sources                                                              | CO <sub>2</sub> ff, CO <sub>2</sub> bf |
| INDUSTRY               | Industry (emissions both from fuel combustion and industrial processes)                                 | CO <sub>2</sub> ff, CO <sub>2</sub> bf |
| DOMESTIC               | Residential, commerce and public services, agricultural equipment, and others (fishing is not included) | CO <sub>2</sub> ff, CO <sub>2</sub> bf |
| ROAD TRANSPORT         | Road transport (cars, buses, trucks, motorcycles, and other on-road vehicles)                           | CO <sub>2</sub> ff                     |
| OTHER TRANSPORT        | Railway, and other off-road transports (navigation is not included)                                     | CO <sub>2</sub> ff                     |

### 1.1.6 VULCAN 3.0

125 The Vulcan Project provides a gridded inventory of anthropogenic CO<sub>2</sub> emissions from fossil fuel combustion and cement production inside the USA. VULCAN 3.0 (Gurney et al., 2020) is the last version available and estimates CO<sub>2</sub>ff emissions at 1×1km and hourly resolution from 2010 to 2015. The current VULCAN version does not include CO<sub>2</sub>bf emissions (CO<sub>2</sub>bf will be added in the upcoming v4.0). CO<sub>2</sub> emissions are estimated at the native spatial-temporal resolution of emission points, lines and polygons depending on the characteristics of the input data sources. Additional spatial and temporal distribution (downscaling, interpolation, proxy surrogates) are needed to achieve hourly resolution for six complete calendar years (2010–2015) at the spatial resolutions of a USA Census block-group or finer (e.g., points, lines) and at 10 different sectors (Table S5). The inventory includes the expanded uncertainty (coverage probability of 95%) of the CO<sub>2</sub> emissions at pixel level. VULCAN v3.0 is freely available at NASA’s Land Process Distributed Active Archive Center (DAAC): <https://doi.org/10.3334/ORNLDAAC/1741>

135

**Table S5: Description of VULCAN 3.0 sectors**

| Sectors                         | Description/Comments                                                                                                                                                                                        |
|---------------------------------|-------------------------------------------------------------------------------------------------------------------------------------------------------------------------------------------------------------|
| Electricity production          | 15566 electricity production facilities, all geolocated to its physical location.                                                                                                                           |
| Industrial                      | Non-point source derived from the USA National GHG Inventory (NGHGI), spatially distributed using total building area and energy use intensity (EUI). Point sources geolocated to each individual facility. |
| Cement                          | Geolocated to each individual facility.                                                                                                                                                                     |
| Commercial                      | Non-point source derived from USA NGHGI, spatially distributed using total building area and energy use intensity. Point sources geolocated to each individual facility.                                    |
| Residential                     | Non-point source derived from USA NGHGI, spatially distributed using total building area and energy use intensity.                                                                                          |
| On road                         | Derived from USA NGHGI, distributed in space and time using traffic data.                                                                                                                                   |
| Nonroad                         | Mobile sources travelling off-road except locomotives, airplanes and CMVs                                                                                                                                   |
| Commercial Marine Vessels (CMV) | Manoeuvring, hoteling, cruise, and reduced speed zone travel and are specific to geographically located ports and shipping lanes that extend 12 nautical miles from the shoreline                           |

|         |                                                                                     |
|---------|-------------------------------------------------------------------------------------|
| Airport | Taxi & take-off/landing sequences up to 3000'' (927 m).                             |
| Rail    | Emissions from diesel-powered locomotives, distributed in space using freight data. |

## 1.2 Global emission inventories used for gap-filling

### 1.2.1 EDGAR 6.0

140 EDGAR is a global gridded emission inventory providing anthropogenic emissions of GHGs (CO<sub>2</sub>ff, CO<sub>2</sub>bf, CH<sub>4</sub>, N<sub>2</sub>O, F-gases) and air pollutants from 1970 to 2018 (version 6.0) (Crippa et al., 2021). Emissions of each species are calculated at country level per sector and year using country specific activity data and emission factors. Emissions are spatially allocated using proxy datasets that may vary over time such as the location of energy and manufacturing facilities, road networks, shipping routes, human and animal population density and agricultural land use, among others. Year-to-year variations are modelled using international annual statistics. Finally, monthly profiles are derived with specific proxy data for each sector and country/region. CO<sub>2</sub> emissions are available separately for CO<sub>2</sub>ff (*CO2\_excl\_short-cycle\_org\_C*) and CO<sub>2</sub>bf (*CO2\_org\_short-cycle\_C*) at 21 categories. EDGAR categories are the basis of the CoCO<sub>2</sub>-MOSAIC sectors and are fully described in Table 3. EDGAR 6.0 is freely available at [https://edgar.jrc.ec.europa.eu/dataset\\_ghg60](https://edgar.jrc.ec.europa.eu/dataset_ghg60).

### 1.2.2 CAMS-GLOB-SHIP 3.1

150 CAMS-GLOB-SHIP (Jalkanen et al., 2016; Granier et al., 2019) provides shipping emissions globally from 2000 to 2018 for NO<sub>x</sub>, SO<sub>x</sub>, CO, CO<sub>2</sub>, VOC, EC, OC, ash and SO<sub>4</sub>. The emissions are estimated by combining (i) global ship activity recorded in Automatic Identification Systems (AIS), (ii) data for vessel technical description, and (iii) the Ship Traffic Emission Assessment Model (STEAM developed by the Finnish Meteorological Institute (FMI) (Jalkanen et al., 2016; Johansson et al., 2017). Shipping emissions are provided separately for sea areas and inland waters (Table S6). CAMS-GLOB-SHIP 3.1 is available at the Copernicus Atmosphere Data Store: <https://ads.atmosphere.copernicus.eu/cdsapp#!/home>.

**Table S6 Description of CAMS-GLOB-SHIP 3.1 categories**

| Sector | Description           |
|--------|-----------------------|
| sea    | Ships at sea areas    |
| inland | Ship at inland waters |

### 1.2.3 CAMS-GLOB-TEMPO 3.1

160 CAMS-TEMPO (Guevara et al., 2021) dataset provides monthly, weekly, daily, and hourly temporal profiles for air pollutants (NO<sub>x</sub>, SO<sub>x</sub>, NMVOC, NH<sub>3</sub>, CO, PM<sub>10</sub>, PM<sub>2.5</sub>) and GHGs (CO<sub>2</sub> and CH<sub>4</sub>). Two versions are available: CAMS-GLOB-TEMPO at global scale and CAMS-REG-TEMPO at European level, matching the spatial coverage and resolution of CAMS-GLOB-ANT and CAMS-REG inventories, respectively. The temporal profiles are normalized weight factors for each hour, day of the week, and month of the year for each sector and species. Temporal profiles can also vary spatially (per

country or grid cell) and/or temporally (from year to year) depending on the input data availability for the species and the temporal resolution considered. The temporal weight factors are calculated by combining national and local statistical information linked to emission variability (e.g., electricity statistics, traffic activity) and existing meteorology-dependent parametrizations to account for the influences of sociodemographic factors and climatological conditions. For the CoCO2-MOSAIC, the monthly weight factors were used (Table S7).

**Table S7: CAMS-GLOB-TEMPO 3.1 monthly factors**

| <b>Sector</b>          | <b>Spatial resolution</b> | <b>Year dependent</b> | <b>Pollutant dependent</b> |
|------------------------|---------------------------|-----------------------|----------------------------|
| Energy industry        | Country                   | no                    | yes                        |
| Residential/commercial | Gridded                   | yes                   | no                         |
| Manufacturing industry | Country                   | no                    | no                         |
| Road transport         | Gridded                   | no                    | no                         |
| Agriculture – NH3/NOx  | Gridded                   | yes                   | -                          |
| Agriculture – other    | Fixed                     | no                    | -                          |

170



### 1.3 Global emission inventories for the inter-comparison

#### 1.3.1 CAMS-GLOB-ANT 5.3

CAMS-GLOB-ANT 5.3 provides anthropogenic emissions of CO<sub>2</sub>ff, CO<sub>2</sub>bf, CH<sub>4</sub>, N<sub>2</sub>O, CO, NO<sub>x</sub>, SO<sub>2</sub>, NH<sub>3</sub>, BC, OC, NMVOCs and 24 individual VOCs globally from 2000 to 2020 (Granier et al., 2019; Soulie et al., 2023). CAMS global emissions are based on EDGAR 5.0 from 2000-2015. They are extrapolated to the current year using CEDS v2021\_04\_21 emissions trends during 2014-2019. The emissions are available at 17 different sectors (Table S8). The inventory includes CAMS-GLOB-SHIP 3.1 shipping emissions, and CAMS-GLOB-TEMPO 3.1 temporal profiles. The combination of CAMS-GLOB-ANT 5.3 with DACCIWA 2.0 is the so called CoCO<sub>2</sub>-PED 2018, i.e., the standard bottom-up inventory used as prior information for CoCO<sub>2</sub> global inversions.

**Table S8: Description of CAMS-GLOB-ANT 5.3 sectors for CO<sub>2</sub>.**

| Sector | Name                          | IPCC sector                                                                                                                        |
|--------|-------------------------------|------------------------------------------------------------------------------------------------------------------------------------|
| ags    | Agricultural soils            | Agricultural soils                                                                                                                 |
| ene    | Power generation              | Energy industry                                                                                                                    |
| fef    | Fugitives                     | Fuel exploitation                                                                                                                  |
| ind    | Industrial process            | Iron and Steel production<br>Aluminium, magnesium and steel production<br>Non-energy use of fuel<br>Non-metallic mineral processes |
| ref    | Refineries                    | Oil refineries and transportation                                                                                                  |
| res    | Residential and other sectors | Residential and other sectors                                                                                                      |
| shp    | Ships                         | Ships                                                                                                                              |
| slv    | Solvents                      | Solvents production and application                                                                                                |
| swd    | Solid waste and waste water   | Waste incineration                                                                                                                 |
| tnr    | Off road transportation       | Non-road ground transportation                                                                                                     |
| tro    | Road transportation           | Road transportation                                                                                                                |

The Community Emissions Data System (CEDS) produces consistent estimates of global air emissions species (BC, CH<sub>4</sub>, CO, CO<sub>2</sub>, N<sub>2</sub>O, NH<sub>3</sub>, NMVOC, NO<sub>x</sub>, OC, SO<sub>2</sub>, VOCs) over the industrial era (1750-present). CEDS emissions are obtained with the bottom-up approach described at (Hoesly et al., 2018; McDuffie et al., 2020). First, the default emissions are estimated at country level per year, compound and sector (55 in total). Sectors are classified into (i) fuel combustion and (ii) process sources. In fuel-combustion sources, nine fuels are defined. Activity data is collected from international bodies, mainly International Energy Agency (IEA) energy statistics, and ODIAC emission factors are applied for CO<sub>2</sub>. For process sources, EDGAR emissions are directly taken. However, the implicit emissions factors are estimated to extend the emissions spatially and temporally by using activity data such as HYDE or UN population datasets, or pulp and paper consumption. Second, the default emissions at country level are scaled to match the total emissions of national inventories. Third, the emissions are disaggregated spatially, using mainly EDGAR 5.0 spatial proxies, and temporally, using ECLIPSE monthly weight factors for all sectors except for shipping (EDGAR based). Finally, the emissions are aggregated into the nine final sectors (Table S9). The last release (CEDS\_v2021\_04\_21) provides gridded emissions at 0.5°×0.5° and 0.1°×0.1° (produced by downscaling the 0.5°×0.5° dataset using EDGAR as spatial proxies). Aviation emissions are only available in the 0.5°×0.5° dataset. Both datasets include only CO<sub>2</sub>ff emissions.

CEDS\_v2021\_04\_21 is available at: <https://data.pnnl.gov/dataset/CEDS-4-21-21>

**Table S9: Description of CEDS v2021\_04\_21 sectors. (c) and (p) stand for combustion and process sector, respectively.**

| Sector         | Description & NFR14 code                                                                                                                                                                                                                                                                                                                                                                                                                                                                                                                                                                                                                                                                           | Sector                                 | Description & NFR14 code                                                                                                                                                                                                                                                                                                                             |
|----------------|----------------------------------------------------------------------------------------------------------------------------------------------------------------------------------------------------------------------------------------------------------------------------------------------------------------------------------------------------------------------------------------------------------------------------------------------------------------------------------------------------------------------------------------------------------------------------------------------------------------------------------------------------------------------------------------------------|----------------------------------------|------------------------------------------------------------------------------------------------------------------------------------------------------------------------------------------------------------------------------------------------------------------------------------------------------------------------------------------------------|
| 0: Agriculture | Agriculture <ul style="list-style-type: none"> <li>• 3B_Manure-management (p)</li> <li>• 3D_Soil-emissions (p)</li> <li>• 3I_Agriculture-other (p)</li> <li>• 3D_Rice-Cultivation (p)</li> <li>• 3E_Enteric-fermentation (p)</li> </ul>                                                                                                                                                                                                                                                                                                                                                                                                                                                            | 4: Residential, commercial, other      | Res., Comm., Other – Residential <ul style="list-style-type: none"> <li>• 1A4b_Residential (c)</li> </ul> Res., Comm., Other – Commercial <ul style="list-style-type: none"> <li>• 1A4a_Commercial-institutional (c)</li> </ul> Res., Comm., Other – Other <ul style="list-style-type: none"> <li>• 1A4c_Agriculture-forestry-fishing (c)</li> </ul> |
| 1: Energy      | Electricity and heat production <ul style="list-style-type: none"> <li>• 1A1a_Electricity-public (c)</li> <li>• 1A1a_Electricity-autoproducer (c)</li> <li>• 1A1a_Heat-production (c)</li> </ul> Fuel Production & Transformation <ul style="list-style-type: none"> <li>• 1A1bc_Other-transformation (p)</li> <li>• 1B1_Fugitive-solid-fuels (p)</li> </ul> Oil and Gas Fugitive/Flaring <ul style="list-style-type: none"> <li>• 1B2_Fugitive-petr-and-gas (p)</li> </ul> Fuel Production and Transformation c <ul style="list-style-type: none"> <li>• 1B2d_Fugitive-other-energy (p)</li> </ul> Fossil Fuel Fires <ul style="list-style-type: none"> <li>• 7A_Fossil-fuel-fires (p)</li> </ul> | 5: Solvents production and application | Solvents production and application <ul style="list-style-type: none"> <li>• 2D_Degreasing-Cleaning (p)</li> <li>• 2D3_Other-product-use (p)</li> <li>• 2D_Paint-application (p)</li> <li>• 2D3_Chemical-products-manufacture-processing (p)</li> </ul>                                                                                              |
| 2: Industry    | Industrial combustion <ul style="list-style-type: none"> <li>• 1A2a_Ind-Comb-Iron-steel (c)</li> <li>• 1A2b_Ind-Comb-Non-ferrous-metals (c)</li> <li>• 1A2c_Ind-Comb-Chemicals (c)</li> <li>• 1A2d_Ind-Comb-Pulp-paper (c)</li> <li>• 1A2e_Ind-Comb-Food-tobacco (c)</li> </ul>                                                                                                                                                                                                                                                                                                                                                                                                                    | 6: Waste                               | Waste <ul style="list-style-type: none"> <li>• 5A_Solid-waste-disposal (p)</li> <li>• 5E_Other-waste-handling (p)</li> <li>• 5C_Waste-incineration (p)</li> <li>• 5D_Wastewater-handling (p)</li> </ul>                                                                                                                                              |

|                   |                                                                                                                                                                                                                                                                                                                                                                                                                                                                                                                                                                                                                                                                                                                                                                                                                     |                           |                                                                                                                                                                                                             |
|-------------------|---------------------------------------------------------------------------------------------------------------------------------------------------------------------------------------------------------------------------------------------------------------------------------------------------------------------------------------------------------------------------------------------------------------------------------------------------------------------------------------------------------------------------------------------------------------------------------------------------------------------------------------------------------------------------------------------------------------------------------------------------------------------------------------------------------------------|---------------------------|-------------------------------------------------------------------------------------------------------------------------------------------------------------------------------------------------------------|
|                   | <ul style="list-style-type: none"> <li>• 1A2f_Ind-Comb-Non-metallic-minerals (c)</li> <li>• 1A2g_Ind-Comb-Construction (c)</li> <li>• 1A2g_Ind-Comb-transpequip (c)</li> <li>• 1A2g_Ind-Comb-machinery (c)</li> <li>• 1A2g_Ind-Comb-mining-quarrying</li> <li>• 1A2g_Ind-Comb-wood-products</li> <li>• 1A2g_Ind-Comb-textile-leather</li> <li>• 1A2g_Ind-Comb-other (c)</li> <li>• 1A5_Other-unspecified (c)</li> </ul> Industrial process and product use <ul style="list-style-type: none"> <li>• 2A1_Cement-production (p)</li> <li>• 2A2_Lime-production (p)</li> <li>• 2A6_Other-minerals (p)</li> <li>• 2B_Chemical-industry (p)</li> <li>• 2C_Metal-production (p)</li> <li>• 2H_Pulp-and-paper-food-beverage-wood (p)</li> <li>• 2L_Other-process-emissions (p)</li> <li>• 6A_Other-in-total (p)</li> </ul> |                           |                                                                                                                                                                                                             |
| 3: Transportation | Road transportation <ul style="list-style-type: none"> <li>• 1A3b_Road (c)</li> </ul> Non-road Transportation <ul style="list-style-type: none"> <li>• 1A3c_Rail (c)</li> <li>• 1A3dii_Domestic-navigation (c)</li> <li>• 1A3eii_Other-transp (c)</li> </ul>                                                                                                                                                                                                                                                                                                                                                                                                                                                                                                                                                        | 7: International shipping | International shipping <ul style="list-style-type: none"> <li>• 1A3di_International-shipping (c)</li> </ul> Tanker Loading <ul style="list-style-type: none"> <li>• 1A3di_Oil_Tanker_Loading (p)</li> </ul> |

### 1.3.3 ODIAC v2020b

205 The Open-source Data Inventory for Anthropogenic CO<sub>2</sub> (ODIAC) version 2020b provides CO<sub>2</sub>ff emissions at 1°×1° and 1/120°×1/120° (~1 km) resolution (Oda et al., 2018). ODIAC emissions are based on CDIAC CO<sub>2</sub>ff national emissions by fuel type. First, CDIAC emissions are mapped into the extended ODIAC emission categories: point, non-point sources, cement production, and international aviation and marine bunkers. Then CDIAC national emissions are disaggregated spatially and temporally. The spatial disaggregation is based on (i) power plant profiles from the CARMA database, for point sources, (ii) DMSP night-time light data, for non-point sources and cement production, (iii) night-time light-based gas flare maps, for gas flaring, and (iv) aircraft and ship fleet track, for international aviation & marine bunker. Finally, emissions are temporally disaggregated using CDIAC monthly gridded emissions. ODIAC are not disaggregated per sectors except for international aviation and marine bunker emissions, which are provided separately and only at 1°×1°. ODIAC inventories are available at <https://db.cger.nies.go.jp/dataset/ODIAC/>

### 1.3.4 CAMS-GLOB-AIR 1.1

215 CAMS-GLOB-AIR 1.1 (Granier et al., 2019) provides aircraft emissions (national and international) of different species including CO<sub>2</sub> at 0.5°×0.5° for 25 altitude levels (from 305m to 14.945m). CAMS-GLOB-AIR 1.1 emissions are the same as CEDS aircraft emissions described in (Hoesly et al., 2018) up to 2014. Since then, they are extrapolated using the trends calculated for the period 2012-2014.

## 220 2 IEA definition of biofuel

IEA definition to identify what belongs to the second category of “biofuel” that generate CO<sub>2</sub>bf:

225 **Biofuels:** Biofuels cover bioethanol, biodiesel, bio-methanol, bio-dimethylether, bio-oil. Liquid biofuels are mainly biodiesel and bioethanol/ETBE used as transport fuels. They can be made from new or used vegetable oils and may be blended with or replace petroleum-based fuels. The natural plant feedstock includes soya, sunflower, and oil seed rape oils. Under some circumstances, used vegetable oils may also be used as feedstock for the process.

**Biogas:** A gas composed principally of methane and carbon dioxide produced by anaerobic digestion of biomass, comprising

- Landfill gas, formed by the digestion of landfilled wastes.
  - Sewage sludge gas, produced from the anaerobic fermentation of sewage sludge.
  - Other biogas, such as biogas produced from the anaerobic fermentation of animal slurries and of wastes in abattoirs, breweries, and other agro-food industries.
- 230

**Black liquor:** This is a recycled by-product formed during the pulping of wood in the paper making industry. In this process, lignin in the wood is separated from cellulose, with the latter forming the paper fibres. Black liquor is the combination of the lignin residue with water and the chemicals used for the extraction of the lignin and is burned in a recovery boiler. The boiler produces steam and electricity and recovers the inorganic chemicals for recycling throughout the process.

235

**Peat (and peat briquettes):** Combustible soft, porous, or compressed, fossil sedimentary deposit of vegetal origin with high water content (up to 90% in the raw state), easily cut, of light to dark brown colour. Only peat used for energy purposes should be reported.

**Solid biomass:** Covers organic, non-fossil material of biological origin which maybe used as fuel for heat production or electricity generation. It comprises:

240

- Charcoal: Covers the solid residue of the destructive distillation and pyrolysis of wood and other vegetal material
  - Wood, wood wastes, other solid wastes: Covers purpose-grown energy crops (poplar, willow, etc.), a multitude of woody materials generated by an industrial process (wood/paper industry in particular) or provided directly by forestry and agriculture (firewood, wood chips, bark, sawdust, shavings, chips, black liquor, etc.) as well as wastes such as straw, rice husks, nut shells, poultry litter, crushed grape dregs, etc. Combustion is the preferred technology for these solid wastes. The quantity of fuel used should be reported on a net calorific value basis.
- 245

### 3 CoCO2-MOSAIC 1.0 description

#### 3.1 File structure and format description

250

```
CoCO2-MOSAIC-v1.0
|- CoCO2-MOSAIC-v1.0_01x01_1M_2015_CO2ff.nc
|- CoCO2-MOSAIC-v1.0_01x01_1M_2015_CO2bf.nc
|- CoCO2-MOSAIC-v1.0_01x01_1M_2015_CO2ff_AIR.nc
|- metadata.csv
```

Figure S1: File structure (example for 2015 files)

Table S10: Summary of the main CoCO2-MOSAIC 1.0 file

|                            |                                                                                                                                                                           |
|----------------------------|---------------------------------------------------------------------------------------------------------------------------------------------------------------------------|
| <b>Product family</b>      | anthropogenic emissions                                                                                                                                                   |
| <b>Species</b>             | CO2ff, CO2bf                                                                                                                                                              |
| <b>Spatial coverage</b>    | global                                                                                                                                                                    |
| <b>Temporal coverage</b>   | 2015, 2016, 2017, 2018                                                                                                                                                    |
| <b>Spatial resolution</b>  | 0.1° × 0.1°                                                                                                                                                               |
| <b>Temporal resolution</b> | monthly                                                                                                                                                                   |
| <b>Sectors</b>             | energy_s<br>energy_a<br>manufacturing<br>settlements<br>transport<br>aviation<br>other                                                                                    |
| <b>Source inventories</b>  | 0: default inventory (EDGAR v6.0/CAMS-GLOB-SHIP v3.1)<br>1: CAMS-REG-GHG v5.1<br>2: DACCIWA v2.0<br>3: GEAA-AEI v3.0<br>4: INEMA v1.0<br>5: REAS v3.2.1<br>6: VULCAN v3.0 |
| <b>Data format</b>         | NetCDF                                                                                                                                                                    |

260

265

**Table S11: Description of the NetCDF data layers of the main file (CO<sub>2</sub>ff and CO<sub>2</sub>bf emissions)**

| Layer                 | Dimensions       | Units                | Data type | Fill value | Description                                                                                                                                                                 |
|-----------------------|------------------|----------------------|-----------|------------|-----------------------------------------------------------------------------------------------------------------------------------------------------------------------------|
| <i>mask_country</i>   | [lat, lon]       | -                    | int16     | -          | Country ISO numeric code (3-digit). Regions defined under conflict by EUROSTAT 2020 don't have an ISO Code, so a 4-digit code was assigned (see metadata.csv)               |
| <i>mask_inventory</i> | [lat, lon]       | -                    | int8      | -          | Numerical ID of the inventory. Attributes.<br>- <i>flag_value</i> : inventory numerical ID<br>- <i>flag_meaning</i> : inventory name<br>- <i>flag_year</i> : inventory year |
| <i>cell_area</i>      | [lat, lon]       | m <sup>2</sup>       | float64   | -          | Area of each grid cell.                                                                                                                                                     |
| <i>energy_s</i>       | [time, lat, lon] | kg/m <sup>2</sup> /s | float32   | -1e30      | Emission flux in the energy_s sector.                                                                                                                                       |
| <i>energy_a</i>       | [time, lat, lon] | kg/m <sup>2</sup> /s | float32   | -1e30      | Emission flux in the energy_a sector.                                                                                                                                       |
| <i>manufacturing</i>  | [time, lat, lon] | kg/m <sup>2</sup> /s | float32   | -1e30      | Emission flux in the manufacturing sector.                                                                                                                                  |
| <i>settlements</i>    | [time, lat, lon] | kg/m <sup>2</sup> /s | float32   | -1e30      | Emission flux in the settlements sector.                                                                                                                                    |
| <i>transport</i>      | [time, lat, lon] | kg/m <sup>2</sup> /s | float32   | -1e30      | Emission flux in the transport sector.                                                                                                                                      |
| <i>aviation</i>       | [time, lat, lon] | kg/m <sup>2</sup> /s | float32   | -1e30      | Emission flux in the aviation sector.                                                                                                                                       |
| <i>other</i>          | [time, lat, lon] | kg/m <sup>2</sup> /s | float32   | -1e30      | Emission flux in the other sector.                                                                                                                                          |

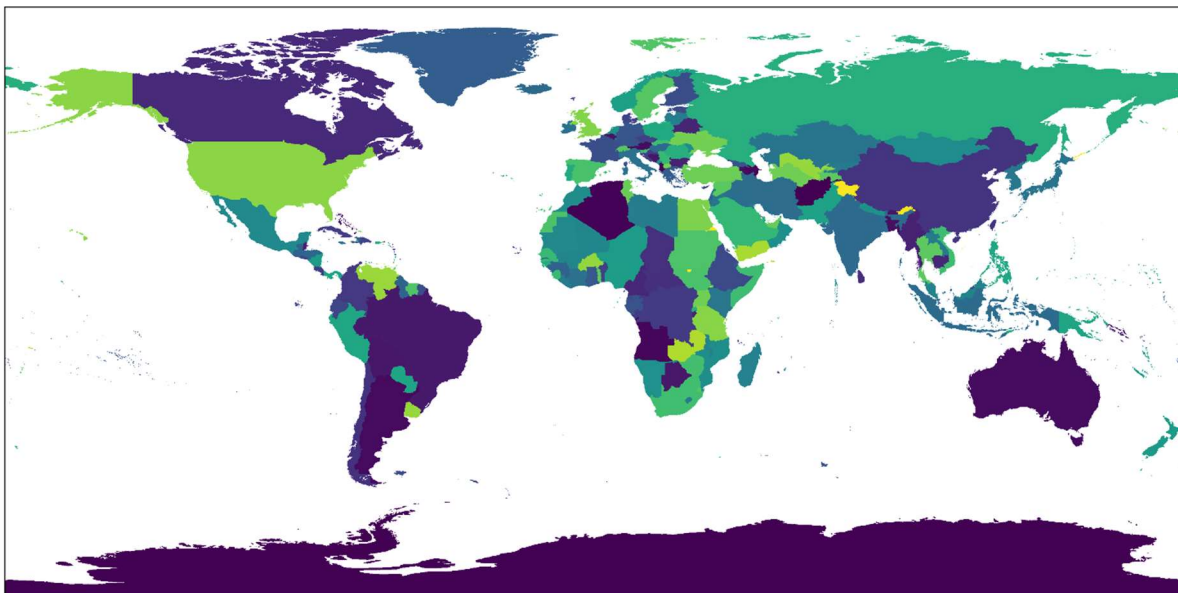

Figure S2: Country mask of CoCO2-MOSAIC 1.0 (*mask\_country*)

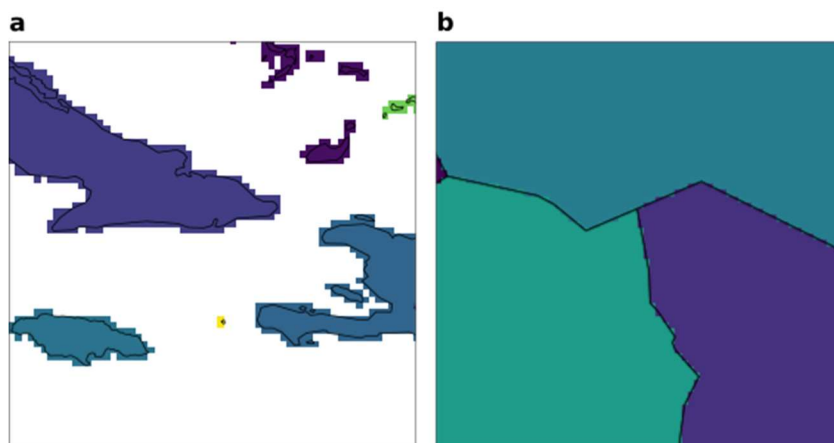

275 Figure S3 Masking procedure applied at (a) coastal pixels and (b) borders between countries.

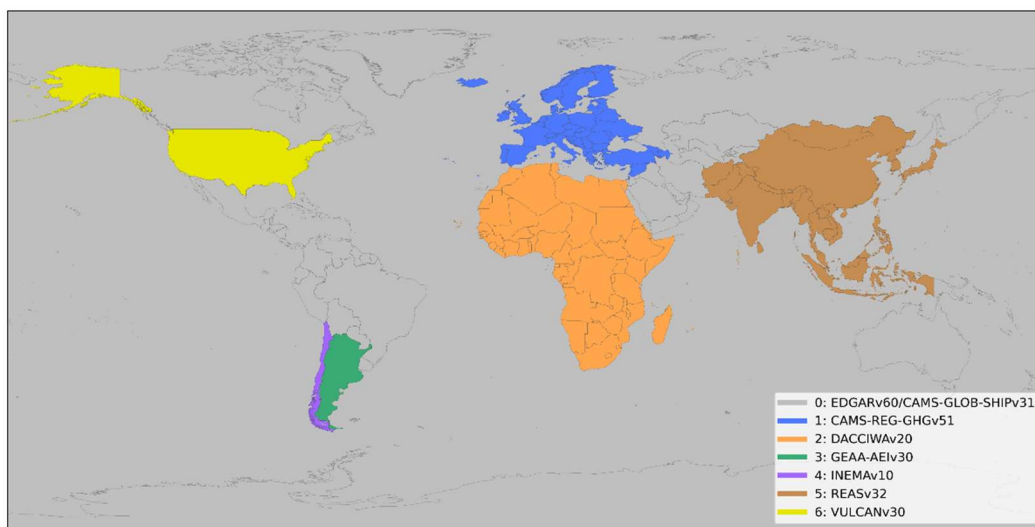

Figure S4 Inventory mask of CoCO<sub>2</sub>-MOSAIC 1.0.

Table S12: Description of countries covered by each regional inventory

| Inventory ID | Inventory name      | Countries                                                                                                                                                                                                                                                                                                       |
|--------------|---------------------|-----------------------------------------------------------------------------------------------------------------------------------------------------------------------------------------------------------------------------------------------------------------------------------------------------------------|
| 1            | CAMS-REG-GHG 5.1    | ALB, ARM, AUT, AZE, BEL, BGR, BIH, BLR, CHE, CYP, CZE, DEU, DNK, ESP, EST, FIN, FRA, GBR, GEO, GRC, HRV, HUN, IRL, ISL, ITA, KOS, LTU, LUX, LVA, MDA, MKD, MLT, MNE, NLD, NOR, POL, PRT, ROU, SRB, SVK, SVN, SWE, TUR, UKR, LBN, PSE, SYR                                                                       |
| 2            | DACCIWA 2.0         | DZA, AGO, BEN, BWA, BFA, BDI, CMR, CPV, CAF, TCD, COM, COG, COD, CIV, DJI, EGY, GNQ, ERI, ETH, GAB, GMB, GHA, GIN, GNB, KEN, LSO, LBR, LBY, MDG, MLI, MWI, MRT, MUS, MYT, MAR, MOZ, NAM, NER, NGA, REU, RWA, STP, SEN, SYC, SLE, SOM, ZAF, SSD, SDN, SWZ, TZA, TGO, TUN, UGA, ESH, ZMB, ZWE, XF, XG, XO, XU, XV |
| 3            | GEAA-AEI 3.0        | ARG                                                                                                                                                                                                                                                                                                             |
| 4            | IENEMA 1.0          | CHL                                                                                                                                                                                                                                                                                                             |
| 5            | REAS 3.2.1          | MNG, KOR, PRK, JPN, CHN, PHL, IDN, TWN, BRN, SGP, MYS, IND, KHM, VNM, LAO, THA, MMR, BTN, BGD, NPL, LKA, MDV, PAK, AFG, TLS, XH, XA, XB, XC, XD, XE, XM, XN                                                                                                                                                     |
| 6            | VULCAN 1.0          | USA                                                                                                                                                                                                                                                                                                             |
| 0            | EDGAR 6.0 (default) | All countries not covered by regional inventories, and sea pixels. Sea pixels are masked as -1 in mask country.                                                                                                                                                                                                 |



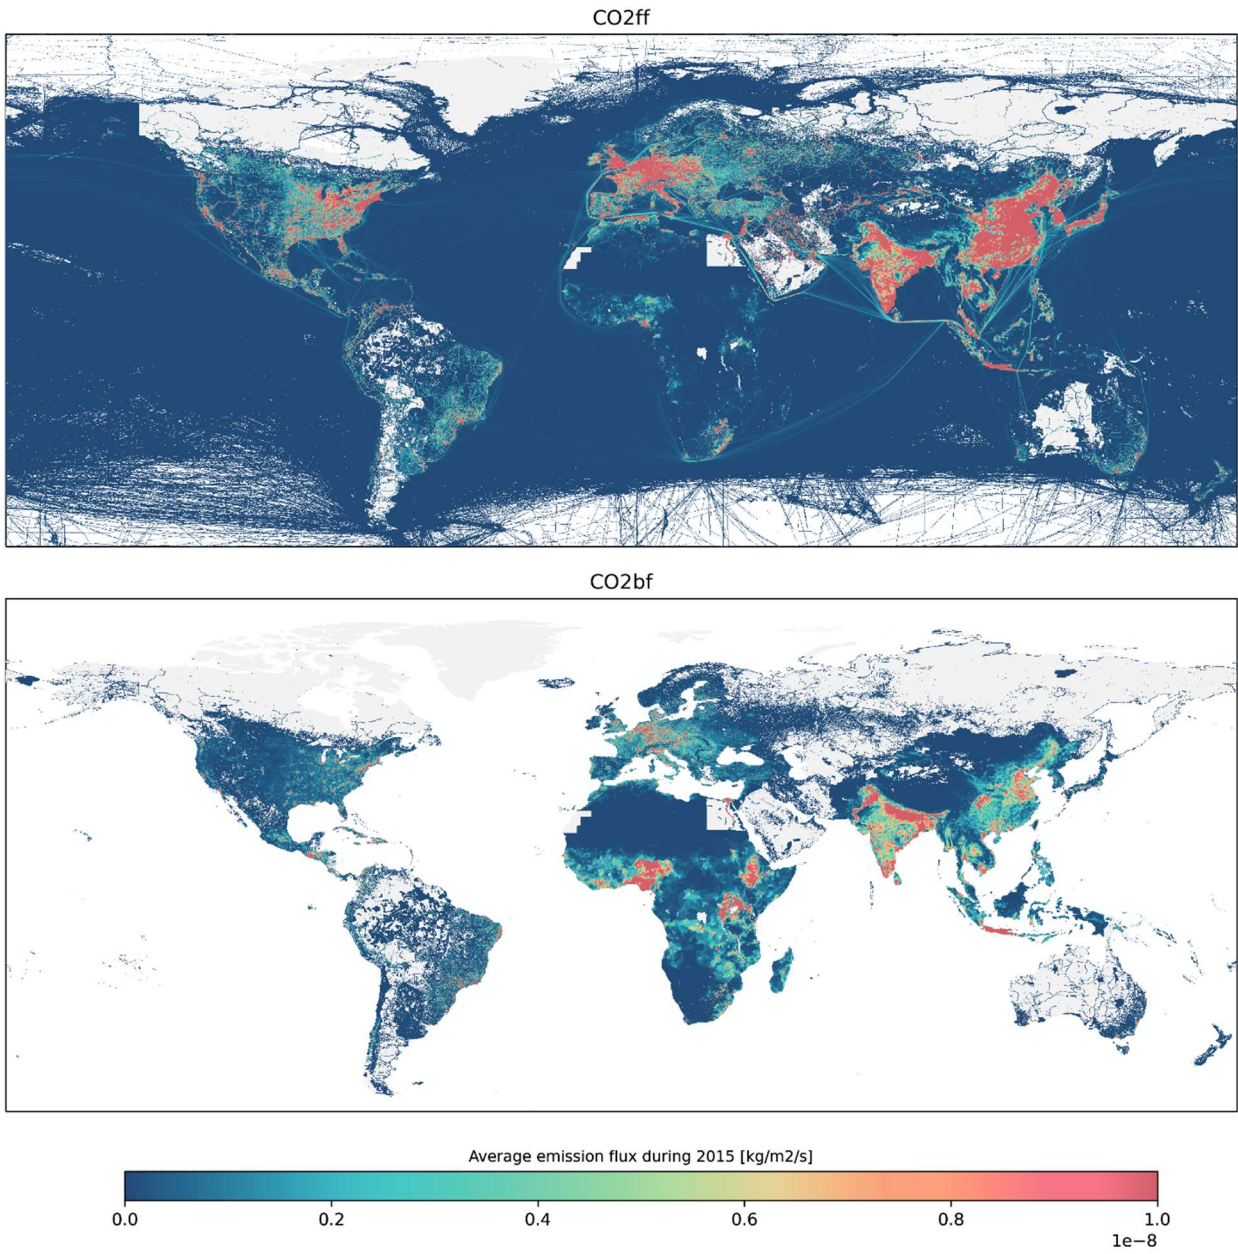

Figure S5 Average flux of CO<sub>2</sub>ff and CO<sub>2</sub>bf anthropogenic emissions during 2015 based on CoCO<sub>2</sub>-MOSAIC 1.0

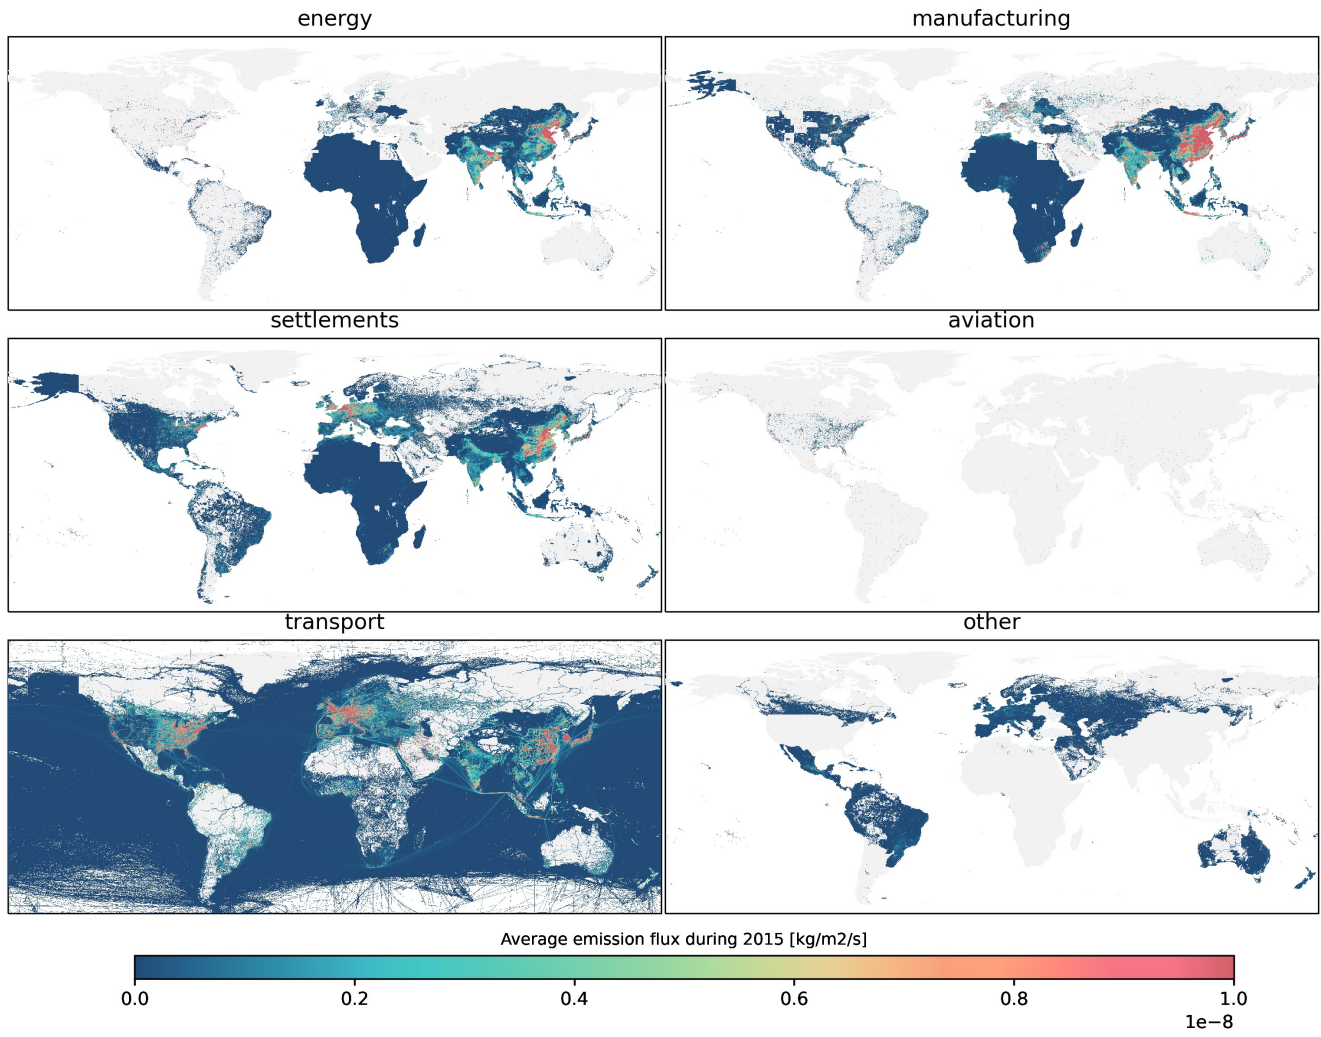

285

Figure S6 Average flux of CO<sub>2</sub> anthropogenic emissions during 2015 per sector based on CoCO<sub>2</sub>-MOSAIC 1.0.

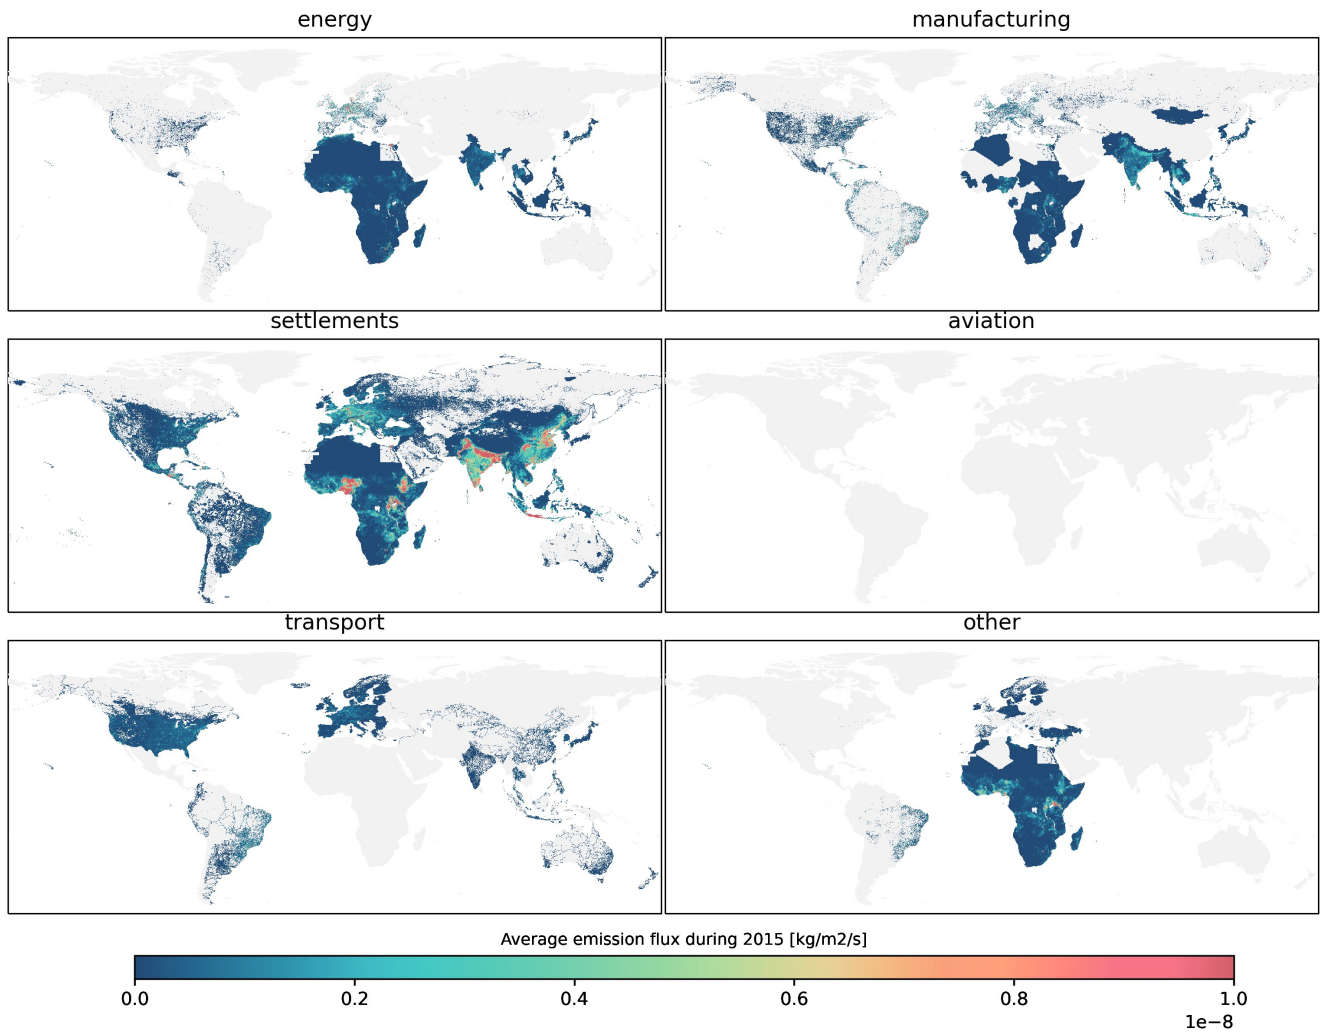

Figure S7 Average flux of CO<sub>2</sub> anthropogenic emissions during 2015 per sector based on CoCO<sub>2</sub>-MOSAIC 1.0

CO<sub>2</sub>ff, aviation above 1km

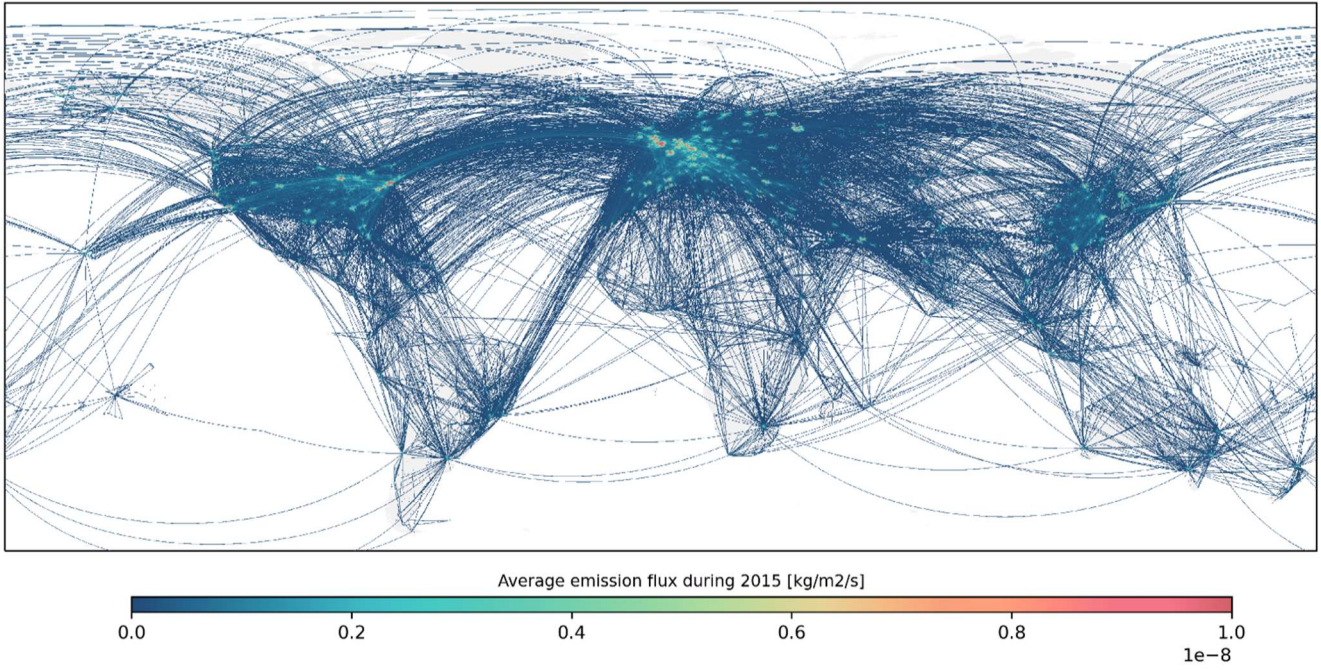

290

Figure S8 Average flux of CO<sub>2</sub>ff anthropogenic emissions above 1km height during 2015 based on CoCO<sub>2</sub>-MOSAIC 1.0

#### 4 Additional figures and tables for the inter-comparison

295 Table S13: Total CO<sub>2</sub>ff emissions [Mt] in 2015 per region and globally. Only land pixels are included. In both cases, aviation emissions are excluded.

| Region                      | Inventory                | energy       | manufacturing | settlements | transport   | other       | total        |
|-----------------------------|--------------------------|--------------|---------------|-------------|-------------|-------------|--------------|
| Europe<br>CAMS-REG-GHG 5.1  | COCO2-MOSAIC 1.0         | 1451         | 859           | 682         | 1143        | 233         | 4368         |
|                             | CAMS-GLOB-ANT 5.3        | 1523         | 818           | 726         | 1079        | 295         | 4441         |
|                             | EDGAR 6.0                | 1542         | 833           | 731         | 1079        | 302         | 4486         |
|                             | CEDS v2021_04_21         | 1654         | 766           | 699         | 1065        | 24          | 4208         |
|                             | ODIAC 2020b              | -            | -             | -           | -           | -           | 4292         |
| Africa<br>DACCIWA 2.0       | COCO2-MOSAIC 1.0         | 529          | 233           | 126         | 276         | 59          | 1224         |
|                             | CAMS-GLOB-ANT 5.3        | 481          | 247           | 116         | 309         | 163         | 1317         |
|                             | EDGAR 6.0                | 471          | 250           | 116         | 331         | 169         | 1336         |
|                             | CEDS v2021_04_21         | 642          | 242           | 97          | 328         | 6           | 1315         |
|                             | ODIAC 2020b              | -            | -             | -           | -           | -           | 1314         |
| Argentina<br>GEAA-AEI 3.0   | COCO2-MOSAIC 1.0         | 47           | 32            | 40          | 49          | 16          | 184          |
|                             | CAMS-GLOB-ANT 5.3        | 54           | 40            | 39          | 45          | 30          | 208          |
|                             | EDGAR 6.0                | 55           | 40            | 39          | 45          | 29          | 208          |
|                             | CEDS v2021_04_21         | 74           | 40            | 39          | 43          | 1           | 198          |
|                             | ODIAC 2020b              | -            | -             | -           | -           | -           | 197          |
| Chile<br>INEMA 1.0          | COCO2-MOSAIC 1.0         | 33           | 8             | 5           | 23          | 0           | 70           |
|                             | CAMS-GLOB-ANT 5.3        | 33           | 18            | 6           | 23          | 3           | 83           |
|                             | EDGAR 6.0                | 33           | 17            | 5           | 24          | 3           | 83           |
|                             | CEDS v2021_04_21         | 32           | 17            | 5           | 24          | 0           | 78           |
|                             | ODIAC 2020b              | -            | -             | -           | -           | -           | 84           |
| South-East Asia<br>REAS 3.2 | COCO2-MOSAIC 1.0         | 6396         | 7293          | 1250        | 1838        | 0           | 16776        |
|                             | CAMS-GLOB-ANT 5.3        | 7088         | 5915          | 1172        | 1757        | 917         | 16849        |
|                             | EDGAR 6.0                | 6937         | 5975          | 1199        | 1768        | 941         | 16820        |
|                             | CEDS v2021_04_21         | 7395         | 5349          | 1054        | 1753        | 40          | 15591        |
|                             | ODIAC 2020b              | -            | -             | -           | -           | -           | 15997        |
| USA<br>VULCAN 3.0           | COCO2-MOSAIC 1.0         | 2087         | 881           | 575         | 2002        | 2           | 5547         |
|                             | CAMS-GLOB-ANT 5.3        | 1976         | 549           | 574         | 1580        | 364         | 5043         |
|                             | EDGAR 6.0                | 1981         | 570           | 561         | 1534        | 361         | 5006         |
|                             | CEDS v2021_04_21         | 2241         | 540           | 552         | 1490        | 26          | 4849         |
|                             | ODIAC 2020b              | -            | -             | -           | -           | -           | 5204         |
| Other regions<br>EDGAR 6.0  | COCO2-MOSAIC 1.0         | 2416         | 1516          | 661         | 1452        | 815         | 6860         |
|                             | CAMS-GLOB-ANT 5.3        | 2384         | 1452          | 649         | 1452        | 825         | 6762         |
|                             | EDGAR 6.0                | 2416         | 1516          | 661         | 1463        | 815         | 6871         |
|                             | CEDS v2021_04_21         | 3052         | 1535          | 615         | 1390        | 22          | 6613         |
|                             | ODIAC 2020b              | -            | -             | -           | -           | -           | 6858         |
| <b>All regions</b>          | <b>COCO2-MOSAIC 1.0</b>  | <b>12958</b> | <b>10823</b>  | <b>3339</b> | <b>7499</b> | <b>1125</b> | <b>35028</b> |
|                             | <b>CAMS-GLOB-ANT 5.3</b> | <b>13570</b> | <b>9046</b>   | <b>3284</b> | <b>6962</b> | <b>2673</b> | <b>34703</b> |
|                             | <b>EDGAR 6.0</b>         | <b>13442</b> | <b>9207</b>   | <b>3314</b> | <b>6840</b> | <b>2694</b> | <b>34811</b> |
|                             | <b>CEDS v2021_04_21</b>  | <b>15158</b> | <b>8494</b>   | <b>3063</b> | <b>6821</b> | <b>118</b>  | <b>32851</b> |
|                             | <b>ODIAC 2020b</b>       | <b>-</b>     | <b>-</b>      | <b>-</b>    | <b>-</b>    | <b>-</b>    | <b>33945</b> |

**Table S14: Total CO<sub>2</sub>f emissions [Mt] in 2015 per region and globally. Only land pixels are included. In both cases, aviation emissions are excluded.**

| <b>Region</b>               | <b>Inventory</b>         | <b>energy</b> | <b>manufacturing</b> | <b>settlements</b> | <b>transport</b> | <b>other</b> | <b>total</b> |
|-----------------------------|--------------------------|---------------|----------------------|--------------------|------------------|--------------|--------------|
| Europe<br>CAMS-REG-GHG 5.1  | COCO2-MOSAIC 1.0         | 184           | 111                  | 279                | 43               | 18           | 635          |
|                             | CAMS-GLOB-ANT 5.3        | 205           | 93                   | 242                | 43               | 2            | 585          |
|                             | EDGAR 6.0                | 206           | 100                  | 243                | 43               | 2            | 594          |
| Africa<br>DACCIWA 2.0       | COCO2-MOSAIC 1.0         | 244           | 105                  | 1294               | 0                | 431          | 2074         |
|                             | CAMS-GLOB-ANT 5.3        | 3             | 84                   | 1244               | 0                | 0            | 1332         |
|                             | EDGAR 6.0                | 4             | 129                  | 1091               | 0                | 0            | 1224         |
| Argentina<br>GEAA-AEI 3.0   | COCO2-MOSAIC 1.0         | 0             | 8                    | 1                  | 3                | 0            | 13           |
|                             | CAMS-GLOB-ANT 5.3        | 3             | 4                    | 3                  | 3                | 0            | 12           |
|                             | EDGAR 6.0                | 3             | 18                   | 2                  | 3                | 0            | 26           |
| Chile<br>INEMA 1.0          | COCO2-MOSAIC 1.0         | 0             | 2                    | 14                 | 0                | 0            | 16           |
|                             | CAMS-GLOB-ANT 5.3        | 15            | 8                    | 7                  | 0                | 0            | 30           |
|                             | EDGAR 6.0                | 15            | 8                    | 7                  | 0                | 0            | 30           |
| South-East Asia<br>REAS 3.2 | COCO2-MOSAIC 1.0         | 97            | 219                  | 1473               | 18               | 0            | 1807         |
|                             | CAMS-GLOB-ANT 5.3        | 201           | 252                  | 1559               | 18               | 0            | 2030         |
|                             | EDGAR 6.0                | 193           | 791                  | 1425               | 18               | 0            | 2428         |
| USA<br>VULCAN 3.0           | COCO2-MOSAIC 1.0         | 69            | 151                  | 89                 | 106              | 0            | 416          |
|                             | CAMS-GLOB-ANT 5.3        | 70            | 121                  | 86                 | 98               | 0            | 374          |
|                             | EDGAR 6.0                | 69            | 151                  | 89                 | 106              | 0            | 417          |
| Other regions<br>EDGAR 6.0  | COCO2-MOSAIC 1.0         | 80            | 562                  | 179                | 65               | 55           | 941          |
|                             | CAMS-GLOB-ANT 5.3        | 82            | 211                  | 185                | 65               | 55           | 598          |
|                             | EDGAR 6.0                | 80            | 562                  | 179                | 65               | 55           | 941          |
| <b>All regions</b>          | <b>COCO2-MOSAIC 1.0</b>  | <b>675</b>    | <b>1158</b>          | <b>3330</b>        | <b>235</b>       | <b>505</b>   | <b>5903</b>  |
|                             | <b>CAMS-GLOB-ANT 5.3</b> | <b>581</b>    | <b>773</b>           | <b>3326</b>        | <b>228</b>       | <b>57</b>    | <b>4962</b>  |
|                             | <b>EDGAR 6.0</b>         | <b>570</b>    | <b>1761</b>          | <b>3037</b>        | <b>236</b>       | <b>57</b>    | <b>5660</b>  |

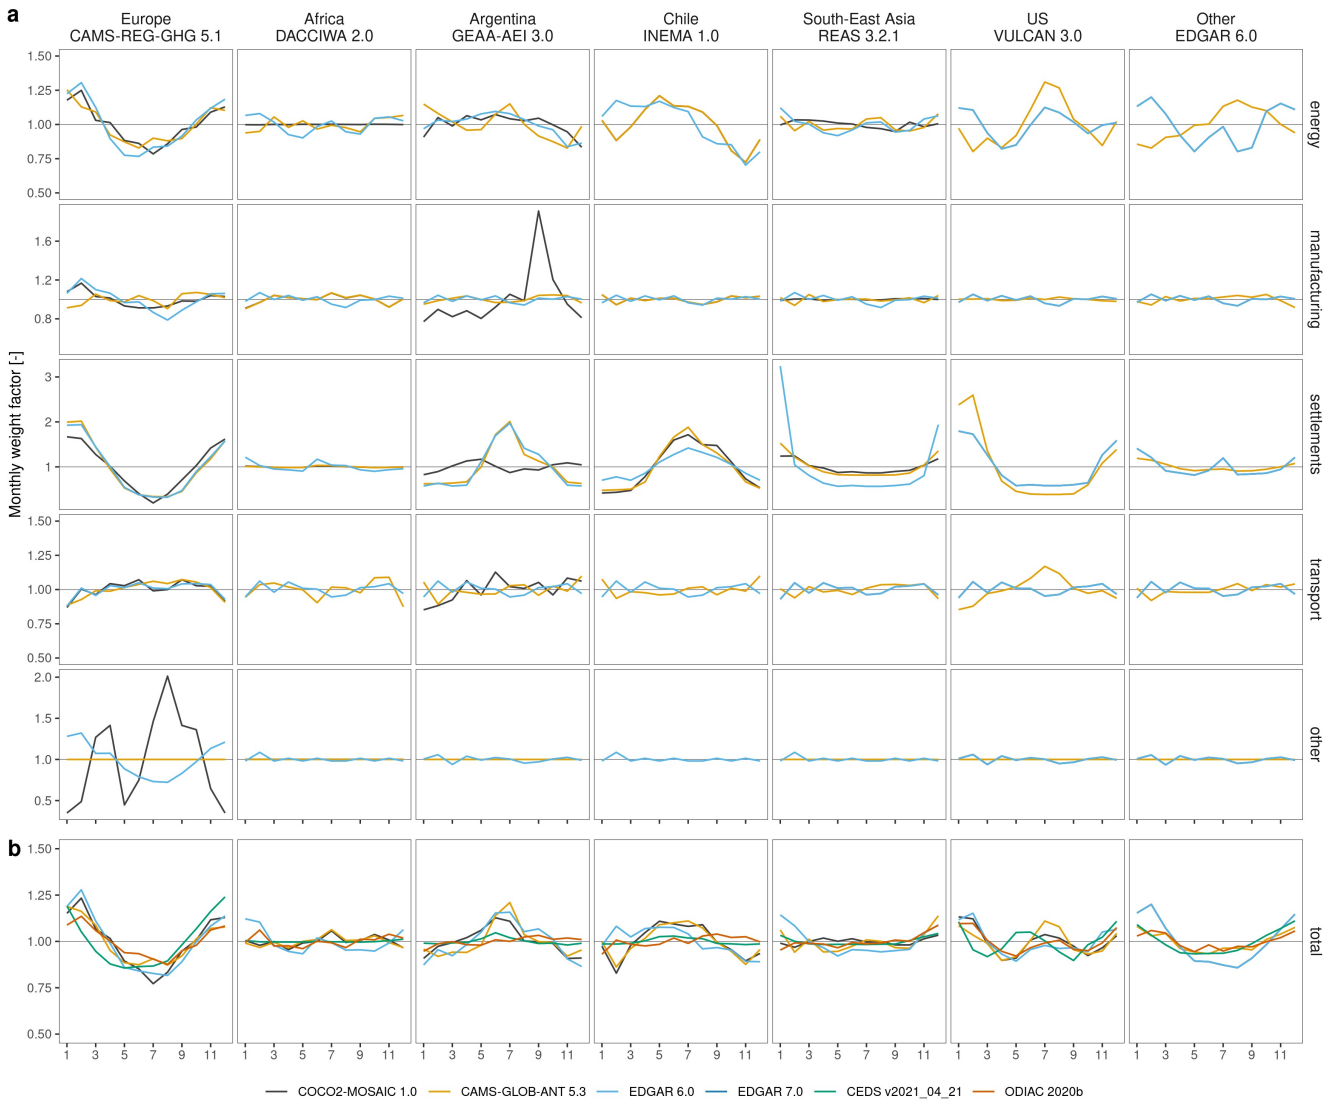

305

**Figure S9 Monthly CO<sub>2</sub>bf weight factors per sector and region. Monthly factors are calculated with the total monthly emissions per region and sector (monthly factor = total monthly emissions per region / total annual emissions per region). Note that the settlement sector has a different scale due to its larger seasonality.**

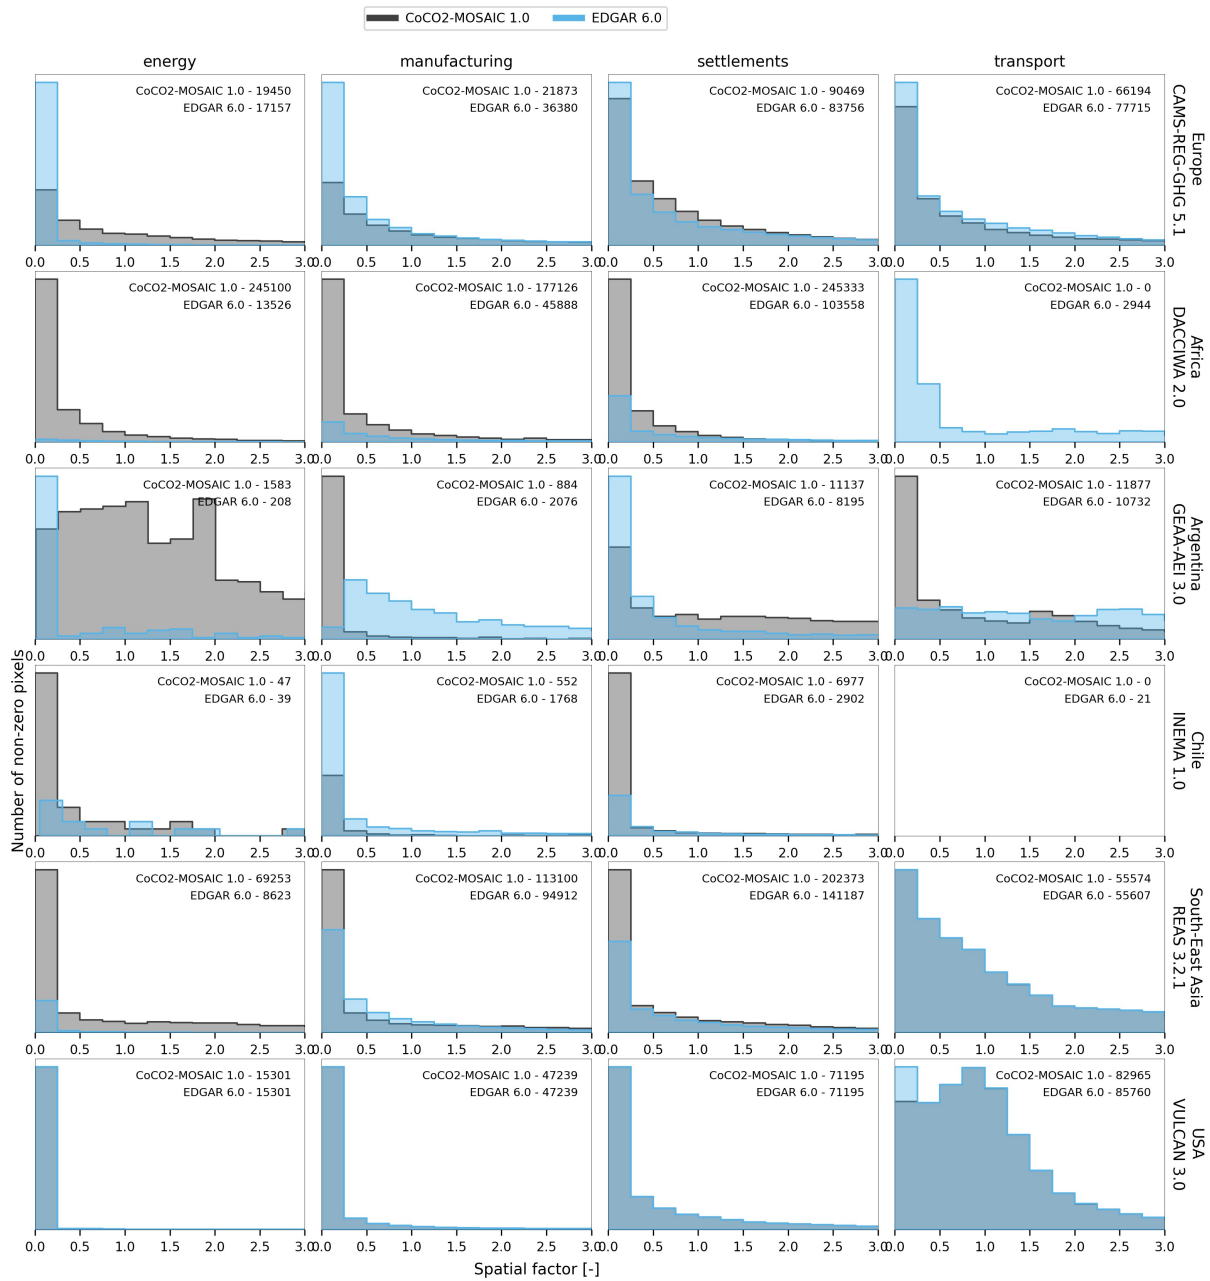

310

**Figure S10 Histogram of annual CO<sub>2</sub>bf spatial weight factor (pixel emission flux / average emission flux in the region) during 2015 per region and sector. The annotation shows the number of pixels with non-zero emissions. Pixels with zero emissions are excluded from the histograms.**

315



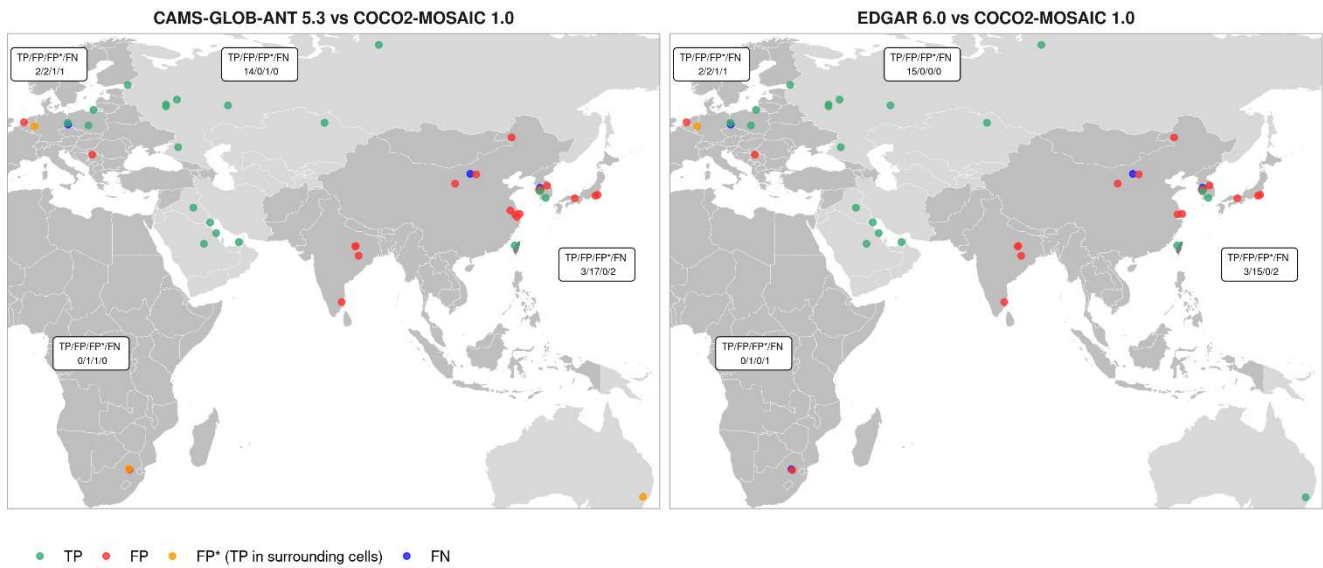

320 **Figure S11 Comparison of the location of super-emitting pixels from the global inventories (test datasets) against those from CoCO2-MOSAIC 1.0 (reference dataset). TP = true positive, FP = false positive, FP\* = false positive, with a TP in the surrounding pixels, FN = false negative.**

**Table S15: Absolute and relative expanded (95%) uncertainty per sector.**

| <b>Sector</b>      | <b>Emissions [Mt]</b> | <b>U [Gt]</b>        | <b>u [%]</b>       |
|--------------------|-----------------------|----------------------|--------------------|
| energy_s           | 799                   | [-0.04, 0.01]        | [-4.5, 1.2]        |
| energy_a           | 12159                 | [-0.39, 0.42]        | [-3.2, 3.4]        |
| manufacturing      | 10824                 | [-0.70, 1.08]        | [-6.5, 10.0]       |
| settlements        | 3340                  | [-0.13, 0.15]        | [-3.9, 4.3]        |
| transport          | 7500                  | [-0.31, 0.46]        | [-4.2, 6.1]        |
| aviation           | 148                   | [-0.00, 0.01]        | [-2.1, 4.1]        |
| aviation above 1km | 768                   | [-0.38, 0.77]        | [-50.1, 100.1]     |
| other              | 1127                  | [-0.11, 0.48]        | [-9.4, 42.8]       |
| <b>TOTAL</b>       | <b>35896.34</b>       | <b>[-0.88, 1.34]</b> | <b>[-2.4, 3.7]</b> |

- Akagi, S. K., Yokelson, R. J., Wiedinmyer, C., Alvarado, M. J., Reid, J. S., Karl, T., Crouse, J. D., and Wennberg, P. O.: Emission factors for open and domestic biomass burning for use in atmospheric models, *Atmos. Chem. Phys.*, 11, 4039–4072, <https://doi.org/10.5194/acp-11-4039-2011>, 2011.
- Álamos, N., Huneeus, N., Opazo, M., Osses, M., Puja, S., Pantoja, N., Denier van der Gon, H., Schueftan, A., Reyes, R., and Calvo, R.: High-resolution inventory of atmospheric emissions from transport, industrial, energy, mining and residential activities in Chile, *Earth Syst. Sci. Data*, 14, 361–379, <https://doi.org/10.5194/essd-14-361-2022>, 2022.
- Crippa, M., Guizzardi, D., Muntean, M., Schaaf, E., Lo Vullo, E., Solazzo, E., Monforti-Ferrario, F., Olivier, J., and Vignati, E.: EDGAR v6.0 Greenhouse Gas Emissions. , 2021.
- Doumbia, E. H. T., Lioussé, C., Keita, S., Granier, L., Granier, C., Elvidge, C. D., Elguindi, N., and Law, K.: Flaring emissions in Africa: Distribution, evolution and comparison with current inventories, *Atmos. Environ.*, 199, 423–434, <https://doi.org/10.1016/j.atmosenv.2018.11.006>, 2019.
- Granier, C., Darras, S., Denier van der Gon, H., Doubalova, J., Elguinidi, N., Galle, B., Gauss, M., Guevara, M., Jalkanen, J.-P., Kuenen, J., Lioussé, C., Quack, B., Simpson, D., and Sindelarova, K.: The Copernicus Atmosphere Monitoring Service global and regional emissions, 2019.
- Guevara, M., Jorba, O., Tena, C., Denier van der Gon, H., Kuenen, J., Elguindi, N., Darras, S., Granier, C., and Pérez García-Pando, C.: Copernicus Atmosphere Monitoring Service TEMPO profiles (CAMs-TEMPO): global and European emission temporal profile maps for atmospheric chemistry modelling, *Earth Syst. Sci. Data*, 13, 367–404, <https://doi.org/10.5194/essd-13-367-2021>, 2021.
- Gurney, K. R., Liang, J., Patarasuk, R., Song, Y., Huang, J., and Roest, G.: The Vulcan Version 3.0 High-Resolution Fossil Fuel CO<sub>2</sub> Emissions for the United States, *J. Geophys. Res. Atmos.*, 125, <https://doi.org/10.1029/2020JD032974>, 2020.
- Hoesly, R. M., Smith, S. J., Feng, L., Klimont, Z., Janssens-Maenhout, G., Pitkanen, T., Seibert, J. J., Vu, L., Andres, R. J., Bolt, R. M., Bond, T. C., Dawidowski, L., Kholod, N., Kurokawa, J., Li, M., Liu, L., Lu, Z., Moura, M. C. P., O'Rourke, P. R., and Zhang, Q.: Historical (1750–2014) anthropogenic emissions of reactive gases and aerosols from the Community Emissions Data System (CEDS), *Geosci. Model Dev.*, 11, 369–408, <https://doi.org/10.5194/gmd-11-369-2018>, 2018.
- Jalkanen, J.-P., Johansson, L., and Kukkonen, J.: A comprehensive inventory of ship traffic exhaust emissions in the European sea areas in 2011, *Atmos. Chem. Phys.*, 16, 71–84, <https://doi.org/10.5194/acp-16-71-2016>, 2016.
- Janssens-Maenhout, G., Crippa, M., Guizzardi, D., Muntean, M., Schaaf, E., Dentener, F., Bergamaschi, P., Pagliari, V., Olivier, J. G. J., Peters, J. A. H. W., van Aardenne, J. A., Monni, S., Doering, U., Petrescu, A. M. R., Solazzo, E., and Oreggioni, G. D.: EDGAR v4.3.2 Global Atlas of the three major greenhouse gas emissions for the period 1970–2012, *Earth Syst. Sci. Data*, 11, 959–1002, <https://doi.org/10.5194/essd-11-959-2019>, 2019.
- Johansson, L., Jalkanen, J.-P., and Kukkonen, J.: Global assessment of shipping emissions in 2015 on a high spatial and temporal resolution, *Atmos. Environ.*, 167, 403–415, <https://doi.org/10.1016/j.atmosenv.2017.08.042>, 2017.

- Keita, S., Liousse, C., Yoboué, V., Dominutti, P., Guinot, B., Assamoi, E.-M., Borbon, A., Haslett, S. L., Bouvier, L., Colomb, A., Coe, H., Akpo, A., Adon, J., Bahino, J., Doumbia, M., Djossou, J., Galy-Lacaux, C., Gardrat, E., Gnamien, S.,  
360 Léon, J. F., Ossohou, M., N'Datchoh, E. T., and Roblou, L.: Particle and VOC emission factor measurements for anthropogenic sources in West Africa, *Atmos. Chem. Phys.*, 18, 7691–7708, <https://doi.org/10.5194/acp-18-7691-2018>, 2018.
- Keita, S., Liousse, C., Assamoi, E.-M., Doumbia, T., N'Datchoh, E. T., Gnamien, S., Elguindi, N., Granier, C., and Yoboué, V.: African anthropogenic emissions inventory for gases and particles from 1990 to 2015, *Earth Syst. Sci. Data*, 13, 3691–  
365 3705, <https://doi.org/10.5194/essd-13-3691-2021>, 2021.
- Kuenen, J., Dellaert, S., Visschedijk, A., Jalkanen, J.-P., Super, I., and Denier van der Gon, H.: CAMS-REG-v4: a state-of-the-art high-resolution European emission inventory for air quality modelling, *Earth Syst. Sci. Data*, 14, 491–515, <https://doi.org/10.5194/essd-14-491-2022>, 2022.
- Kurokawa, J. and Ohara, T.: Long-term historical trends in air pollutant emissions in Asia: Regional Emission inventory in  
370 ASia (REAS) version 3, *Atmos. Chem. Phys.*, 20, 12761–12793, <https://doi.org/10.5194/acp-20-12761-2020>, 2020.
- McDuffie, E. E., Smith, S. J., O'Rourke, P., Tibrewal, K., Venkataraman, C., Marais, E. A., Zheng, B., Crippa, M., Brauer, M., and Martin, R. V.: A global anthropogenic emission inventory of atmospheric pollutants from sector- and fuel-specific sources (1970–2017): an application of the Community Emissions Data System (CEDS), *Earth Syst. Sci. Data*, 12, 3413–  
3442, <https://doi.org/10.5194/essd-12-3413-2020>, 2020.
- 375 Oda, T., Maksyutov, S., and Andres, R. J.: The Open-source Data Inventory for Anthropogenic CO<sub>2</sub>, version 2016 (ODIAC2016): a global monthly fossil fuel CO<sub>2</sub> gridded emissions data product for tracer transport simulations and surface flux inversions, *Earth Syst. Sci. Data*, 10, 87–107, <https://doi.org/10.5194/essd-10-87-2018>, 2018.
- Puliafito, S. E., Bolaño-Ortiz, T. R., Fernandez, R. P., Berná, L. L., Pascual-Flores, R. M., Urquiza, J., López-Noreña, A. I.,  
380 and Tames, M. F.: High-resolution seasonal and decadal inventory of anthropogenic gas-phase and particle emissions for Argentina, *Earth Syst. Sci. Data*, 13, 5027–5069, <https://doi.org/10.5194/essd-13-5027-2021>, 2021.
- Soulie, A., Granier, C., Darras, S., Doumbia, T., Guevara, M., Jalkanen, J., Keita, S., and Liousse, C.: Global Anthropogenic Emissions (CAMS-GLOB-ANT) for Air Quality Forecasting and Reanalyses for the Copernicus Atmosphere Monitoring Service, *Earth Syst. Sci. Data* (to be Submitt.), 2023.

385
